# Supplementary material
Source: MDPI journal article supplement (https://www.mdpi.com/2297-8739/9/3/69)
Supplement: s1 [file s1]

**Table S1.** Adsorption results (efficiency, %) of the selected compounds on all FPSE membranes studied.

| Extraction time (min) | Sample Volume (mL) | pH | Sol-gel CW 20M   |     |     | Sol-gel PEG 300 |     |     | Sol-gel UCON               |     |     | Sol-gel CN-CW20M |     |     |
|-----------------------|--------------------|----|------------------|-----|-----|-----------------|-----|-----|----------------------------|-----|-----|------------------|-----|-----|
|                       |                    |    | EPI              | DAU | DOX | EPI             | DAU | DOX | EPI                        | DAU | DOX | EPI              | DAU | DOX |
| 30                    | 10                 | 3  | 54               | 72  | 26  | 4               | 19  | 14  | 30                         | 44  | 41  | 94               | 95  | 94  |
| 15                    | 10                 | 9  | 67               | 87  | 63  | 49              | 64  | 54  | 0                          | 0   | 0   | 75               | 52  | 72  |
| 30                    | 10                 | 9  | 93               | 100 | 96  | 96              | 100 | 86  | 78                         | 37  | 83  | 49               | 47  | 52  |
| 15                    | 10                 | 3  | 44               | 81  | 40  | 4               | 12  | 4   | 46                         | 58  | 35  | 0                | 0   | 0   |
| 15                    | 20                 | 3  | 30               | 86  | 30  | 20              | 22  | 15  | 10                         | 20  | 14  | 28               | 33  | 29  |
| 30                    | 20                 | 3  | 62               | 85  | 37  | 9               | 14  | 9   | 87                         | 89  | 91  | 0                | 0   | 12  |
| 30                    | 20                 | 9  | 73               | 0   | 58  | 79              | 60  | 76  | 59                         | 84  | 82  | 0                | 0   | 0   |
| 15                    | 20                 | 9  | 81               | 62  | 97  | 81              | 20  | 95  | 18                         | 42  | 24  | 20               | 0   | 0   |
|                       |                    |    | Sol-gel PTHF 250 |     |     | Sol-gel SILICA  |     |     | Sol-gel PCAP - PDMS - PCAP |     |     |                  |     |     |
| 30                    | 10                 | 3  | 30               | 51  | 3   | 93              | 96  | 92  | 0                          | 0   | 0   | -                | -   | -   |
| 15                    | 10                 | 9  | 96               | 83  | 95  | 74              | 41  | 68  | 50                         | 56  | 18  | -                | -   | -   |
| 30                    | 10                 | 9  | 0                | 29  | 0   | 50              | 49  | 49  | 88                         | 7   | 86  | -                | -   | -   |
| 15                    | 10                 | 3  | 89               | 85  | 86  | 50              | 60  | 59  | 0                          | 0   | 0   | -                | -   | -   |
| 15                    | 20                 | 3  | 12               | 25  | 26  | 88              | 94  | 89  | 99                         | 97  | 98  | -                | -   | -   |
| 30                    | 20                 | 3  | 72               | 72  | 63  | 5               | 31  | 39  | 0                          | 0   | 11  | -                | -   | -   |
| 30                    | 20                 | 9  | 45               | 77  | 63  | 11              | 0   | 0   | 3                          | 0   | 86  | -                | -   | -   |
| 15                    | 20                 | 9  | 73               | 41  | 43  | 79              | 69  | 78  | 52                         | 63  | 61  | -                | -   | -   |
